# Supplementary material for: Breast Cancer Incidence Among US Women Aged 20 to 49 Years by Race, Stage, and Hormone Receptor Status
Source: PubMed Central journal article supplement (PMC10818222; doi:10.1001/jamanetworkopen.2023.53331), 2024-01-26
Supplement: jamanetwopen-e2353331-s002.pdf [file jamanetwopen-e2353331-s002.pdf]

## Data Sharing Statement

Xu. Breast Cancer Incidence Among US Women Aged 20 to 49 Years by Race, Stage, and Hormone Receptor Status. *JAMA Netw Open*. Published January 26, 2024.

doi:10.1001/jamanetworkopen.2023.53331

### Data

**Data available:** No

### Additional Information

**Explanation for why data not available:** Surveillance, Epidemiology, and End Results (SEER) data is publicly available. Requests for SEER data are to be made at

<https://seer.cancer.gov/data/access.html>
